# Supplementary figures and images for: {110}-exposed rutile titanium dioxide nanorods in photocatalytic performance
Source: Royal Society of Chemistry journal article supplement (doi:10.1039/b902299f), 2009-01-01

Light source: Mg  $K\alpha$  Reference: metal In  $3d_{5/2}$  at 445.5 eV

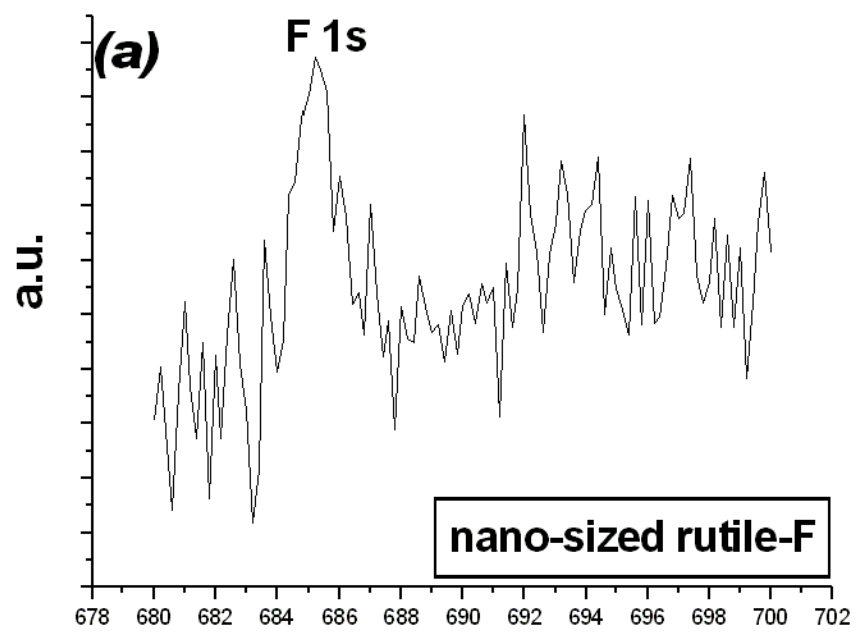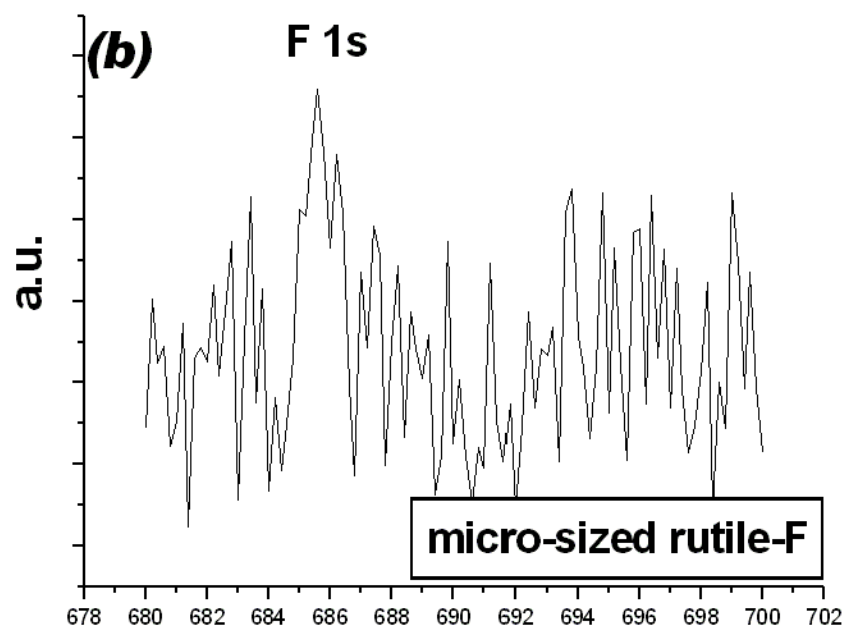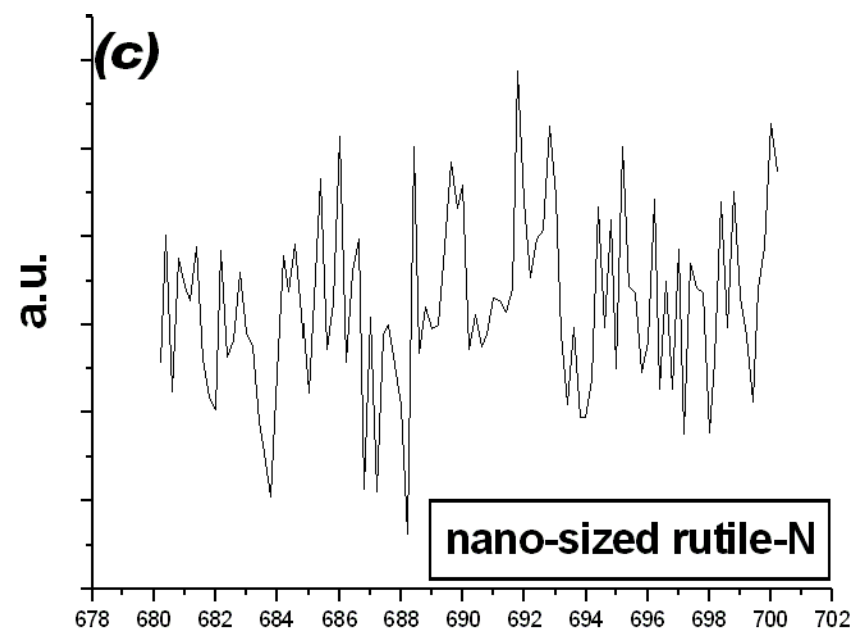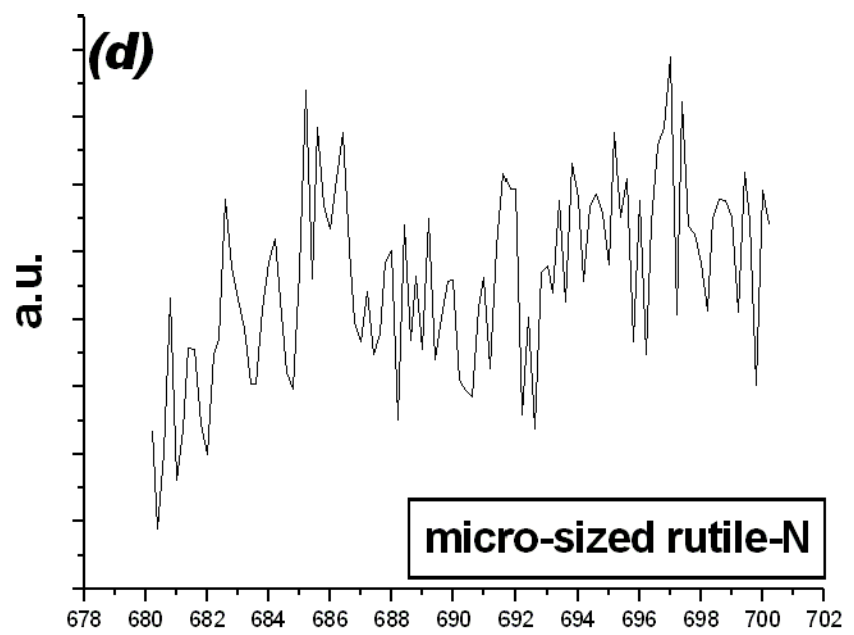

**Binding Energy (eV)**

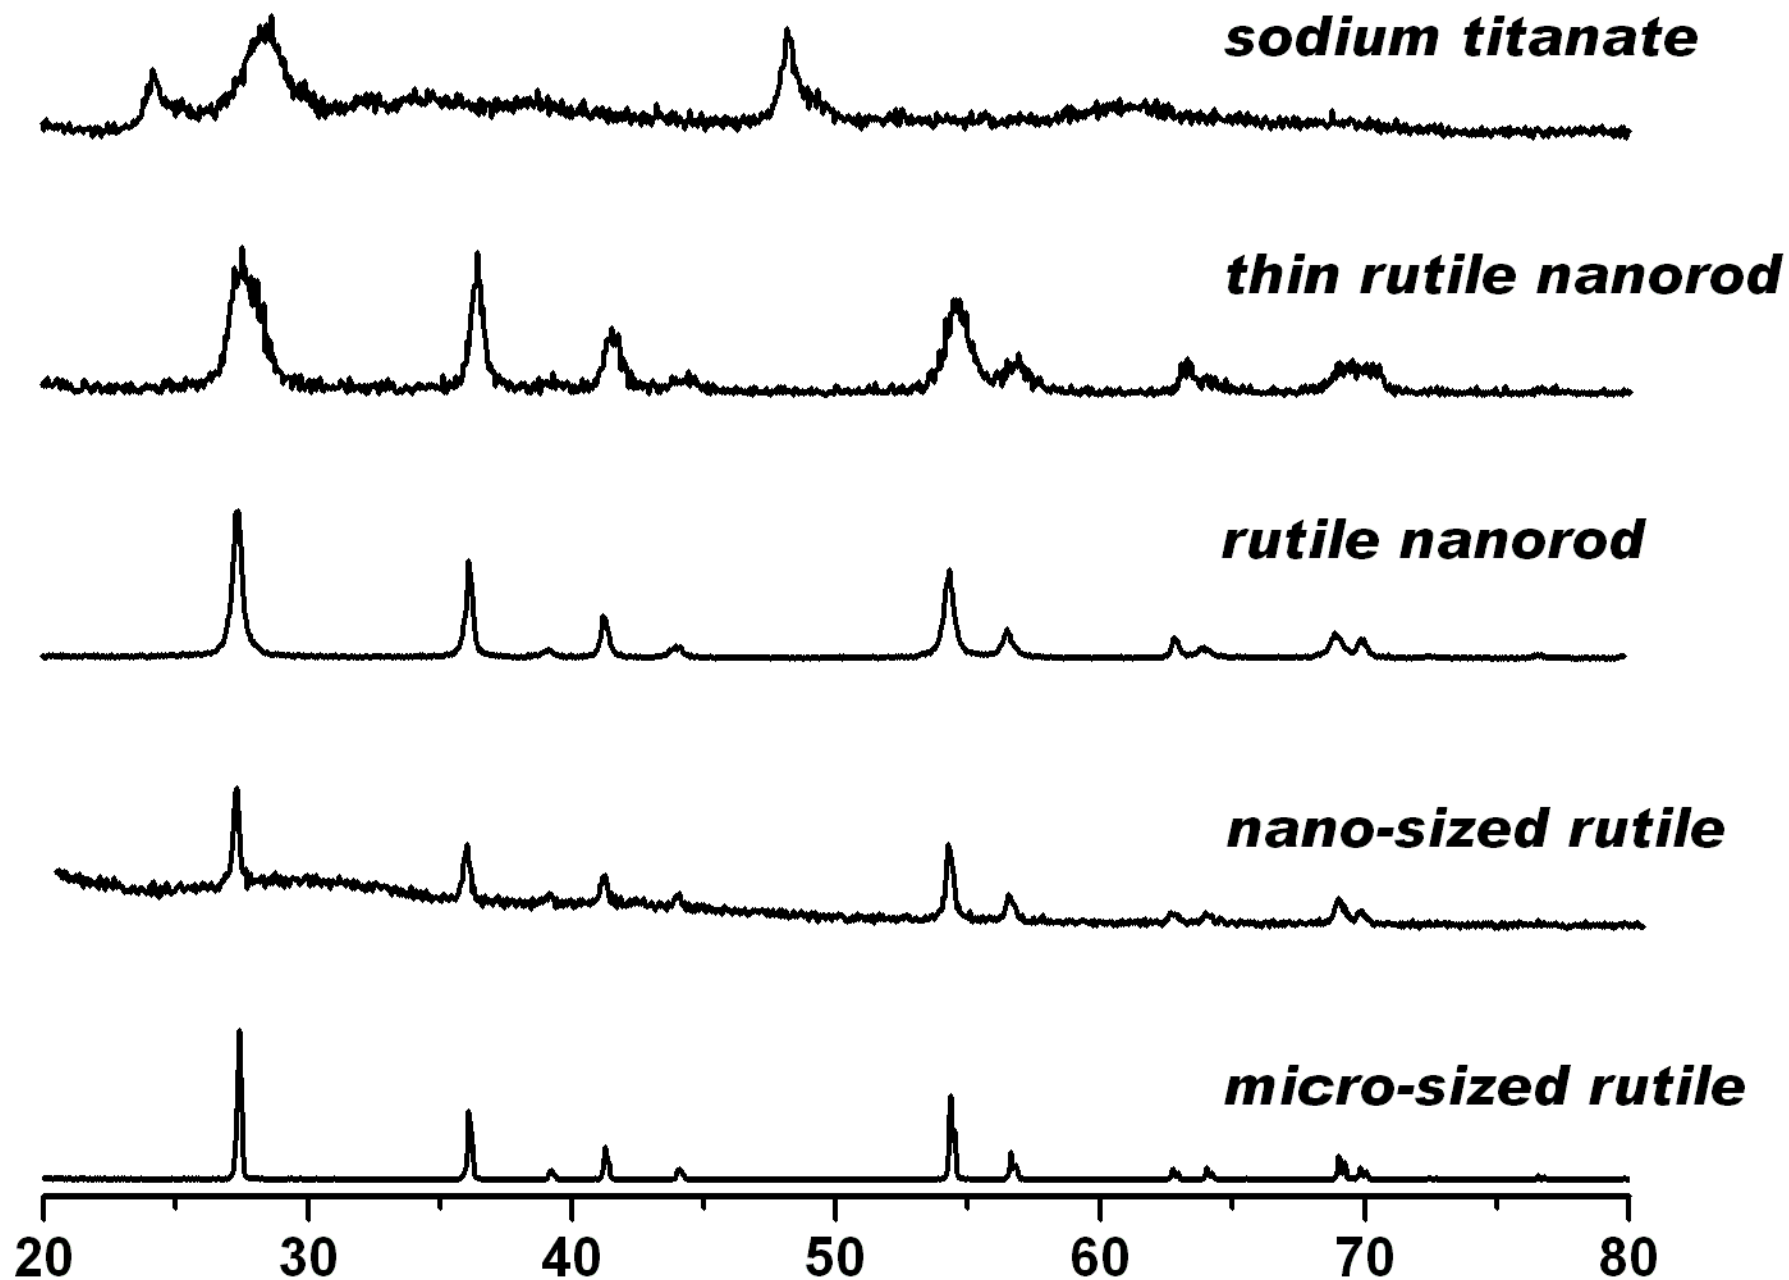

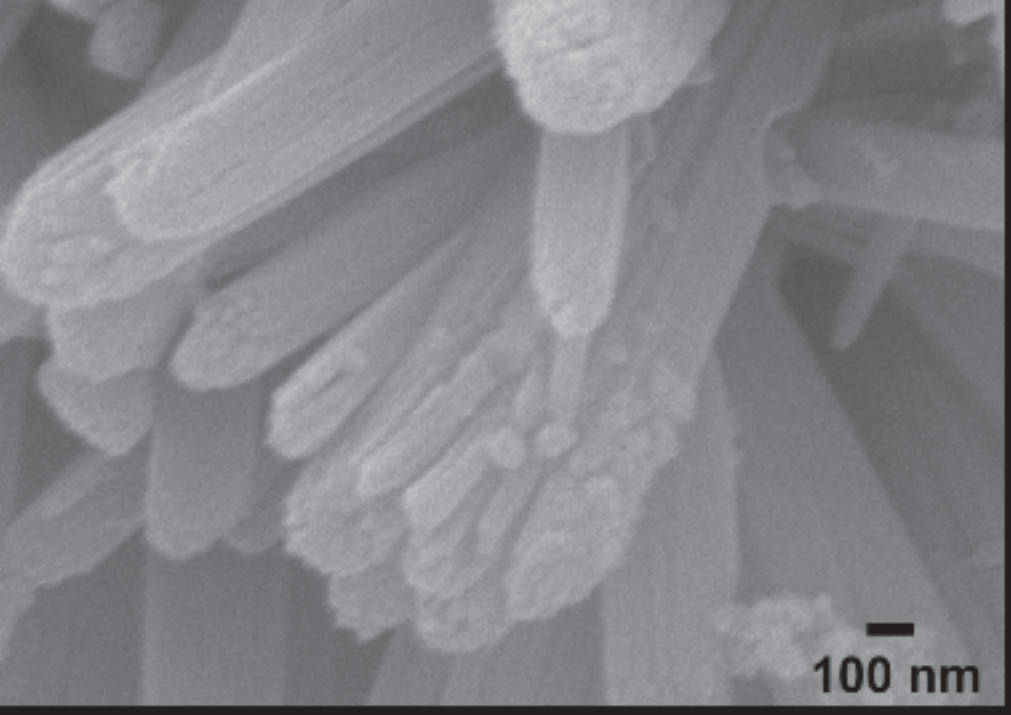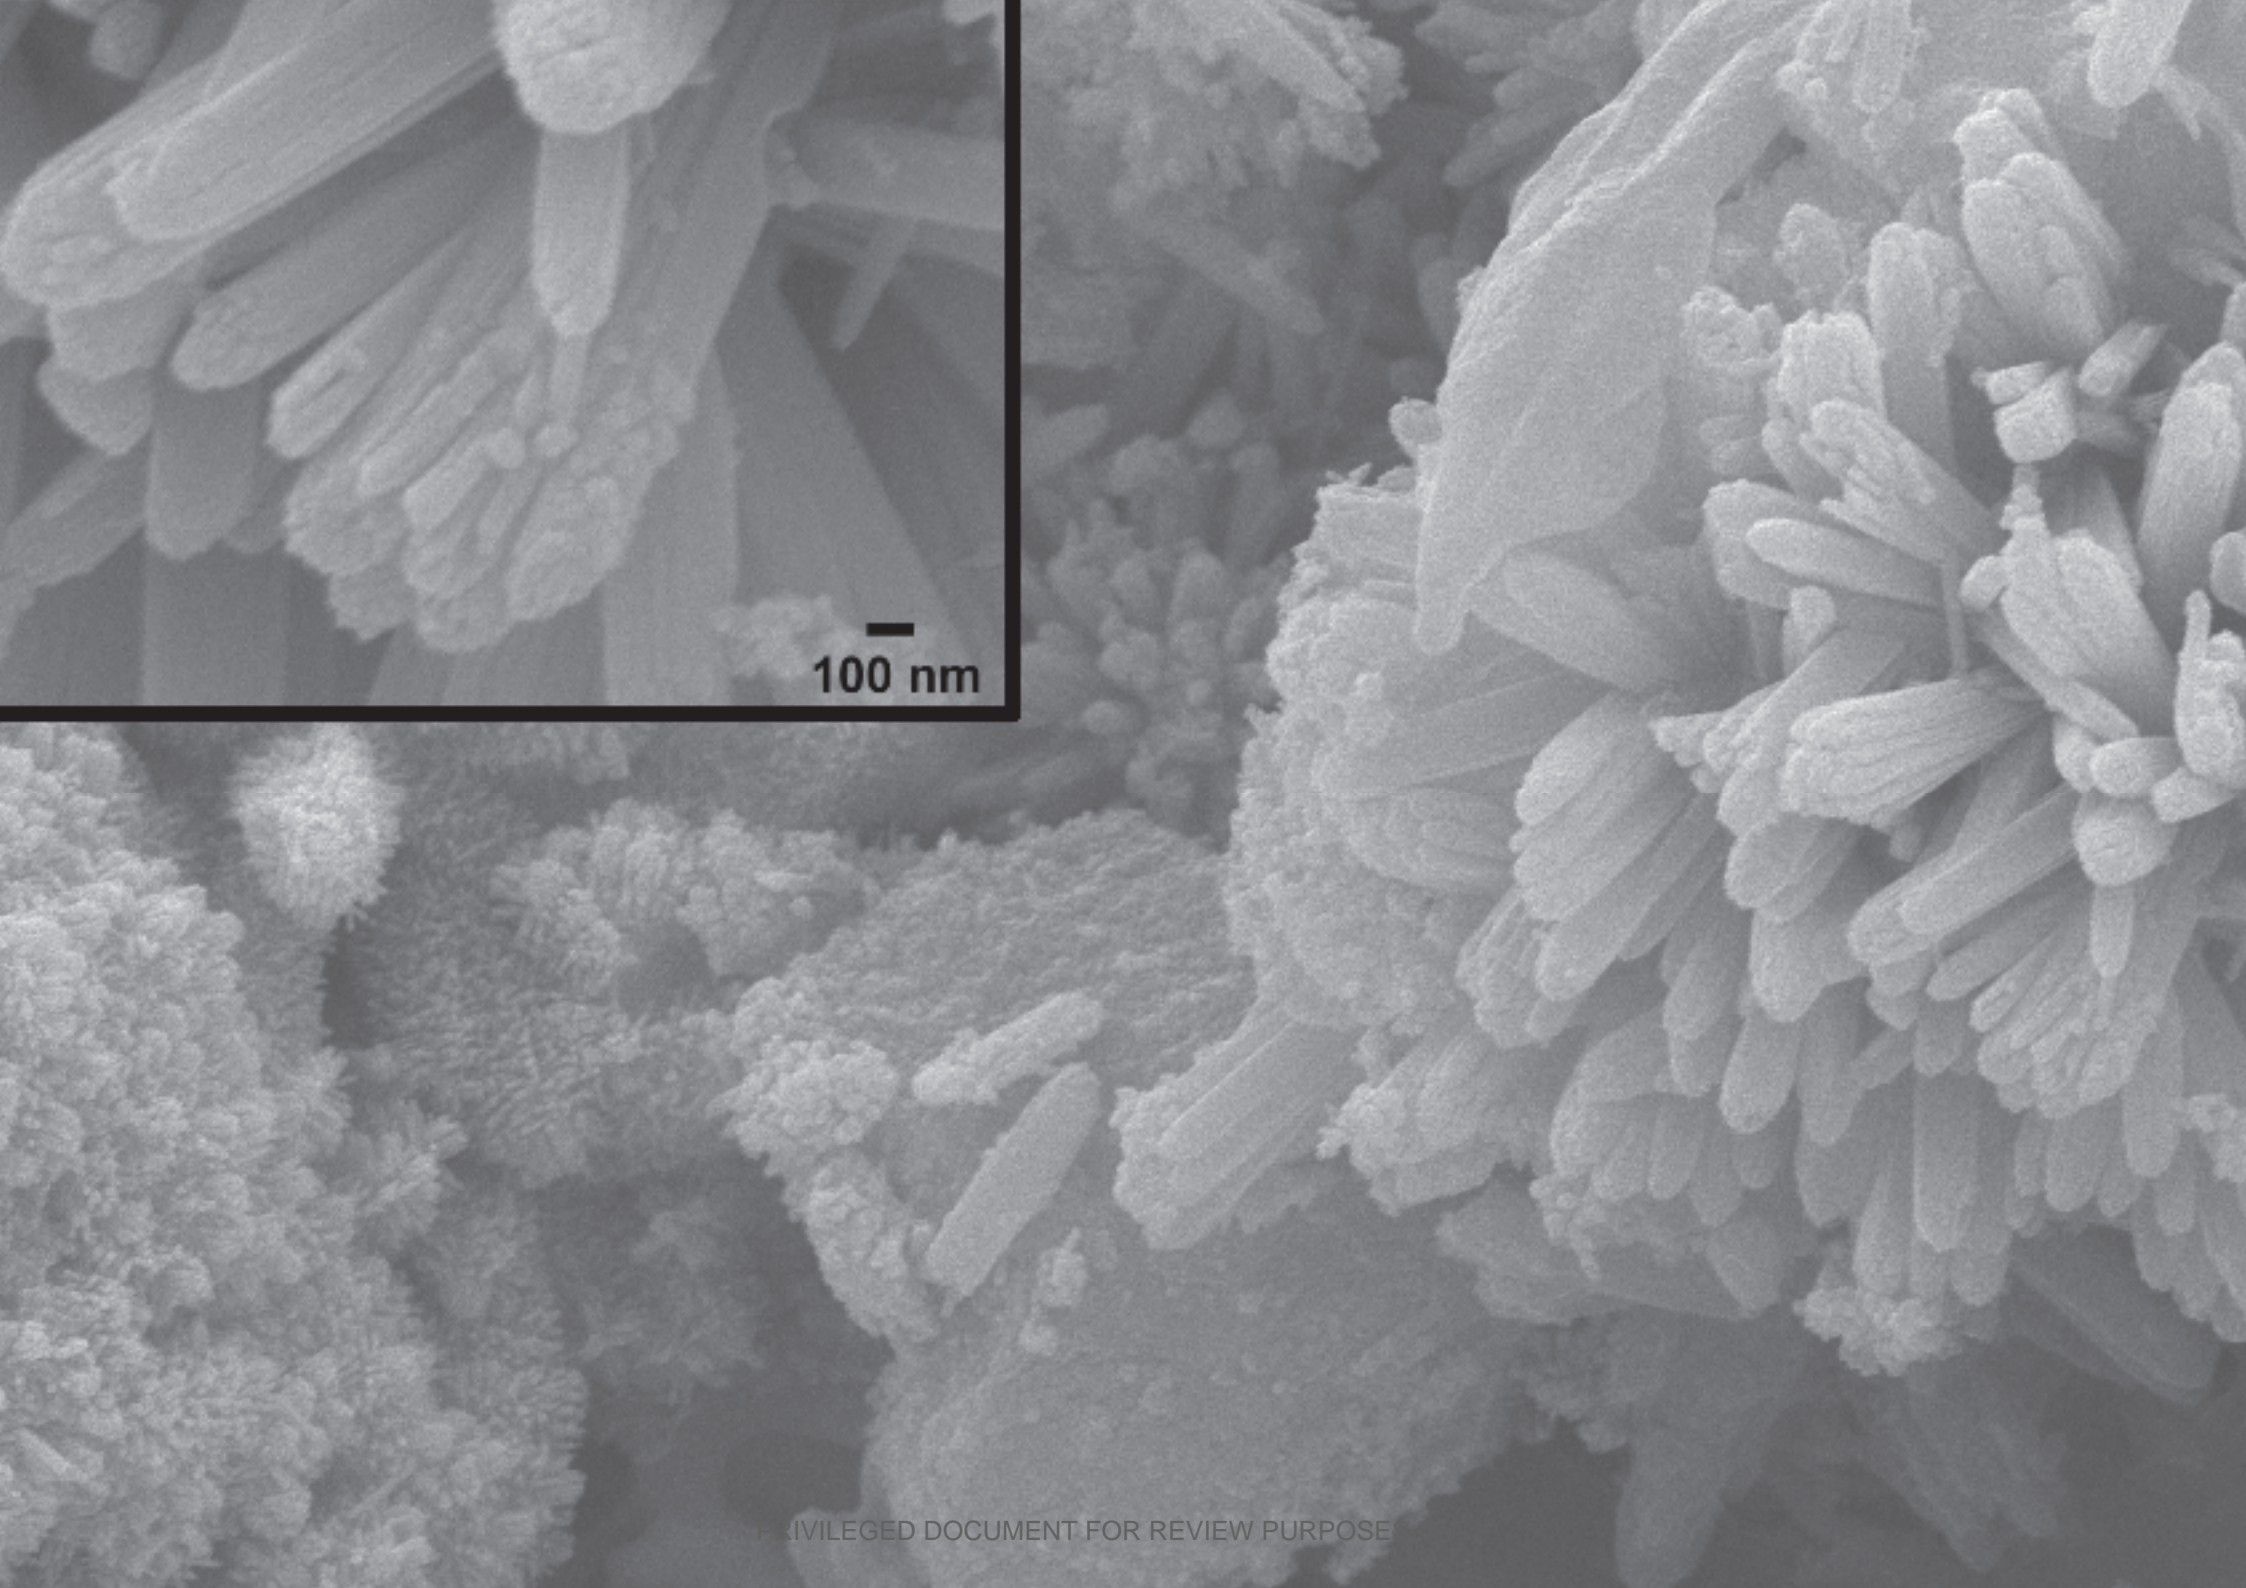

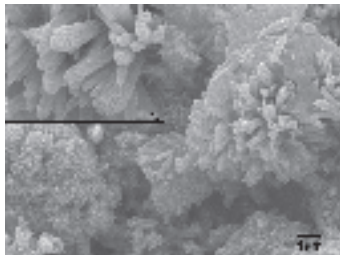

(a)

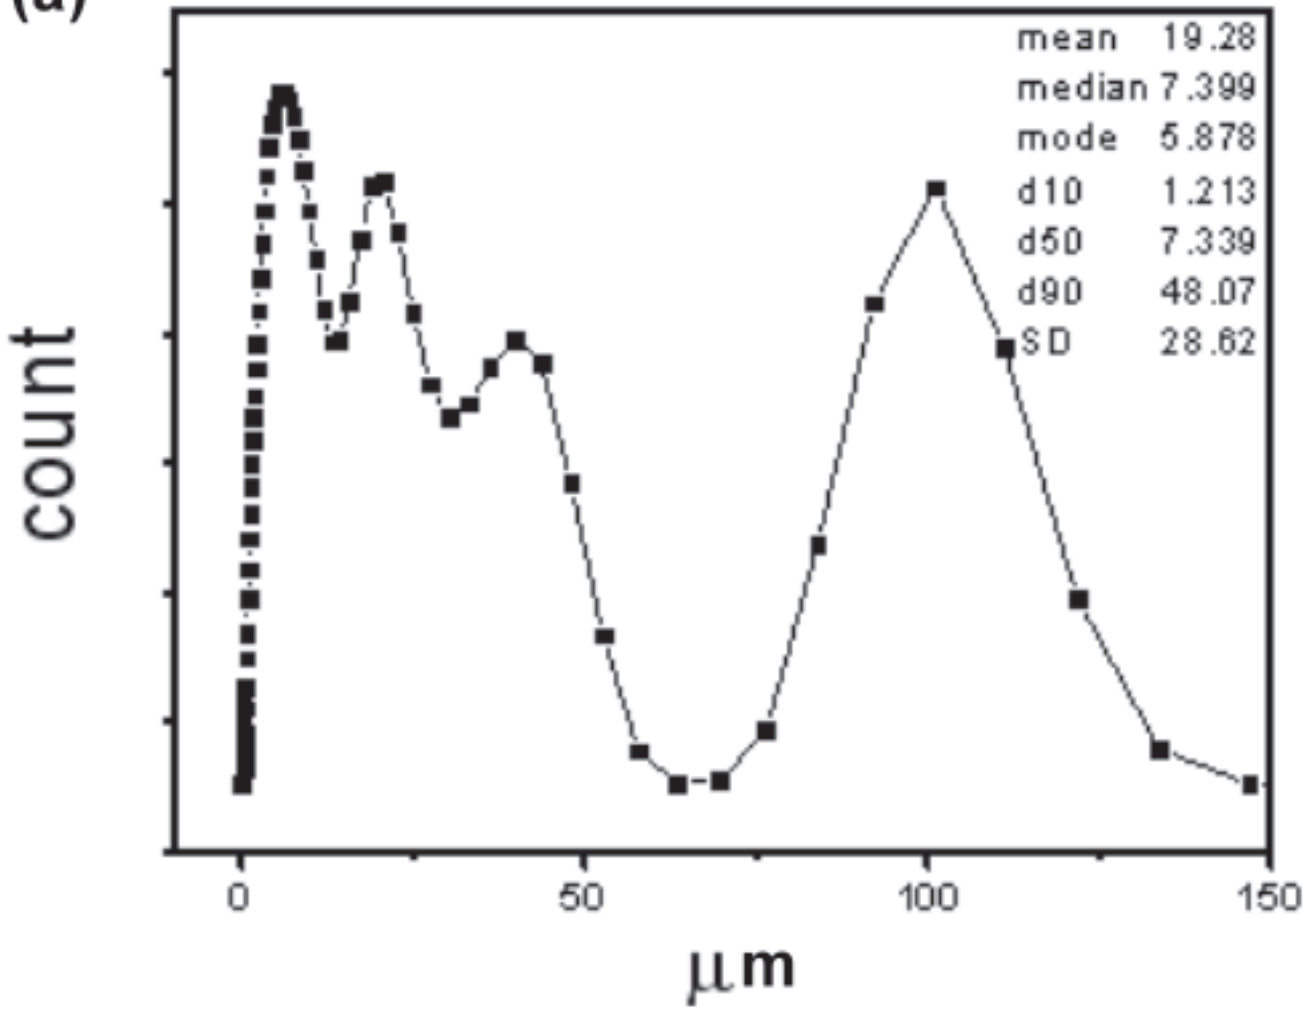

(b)

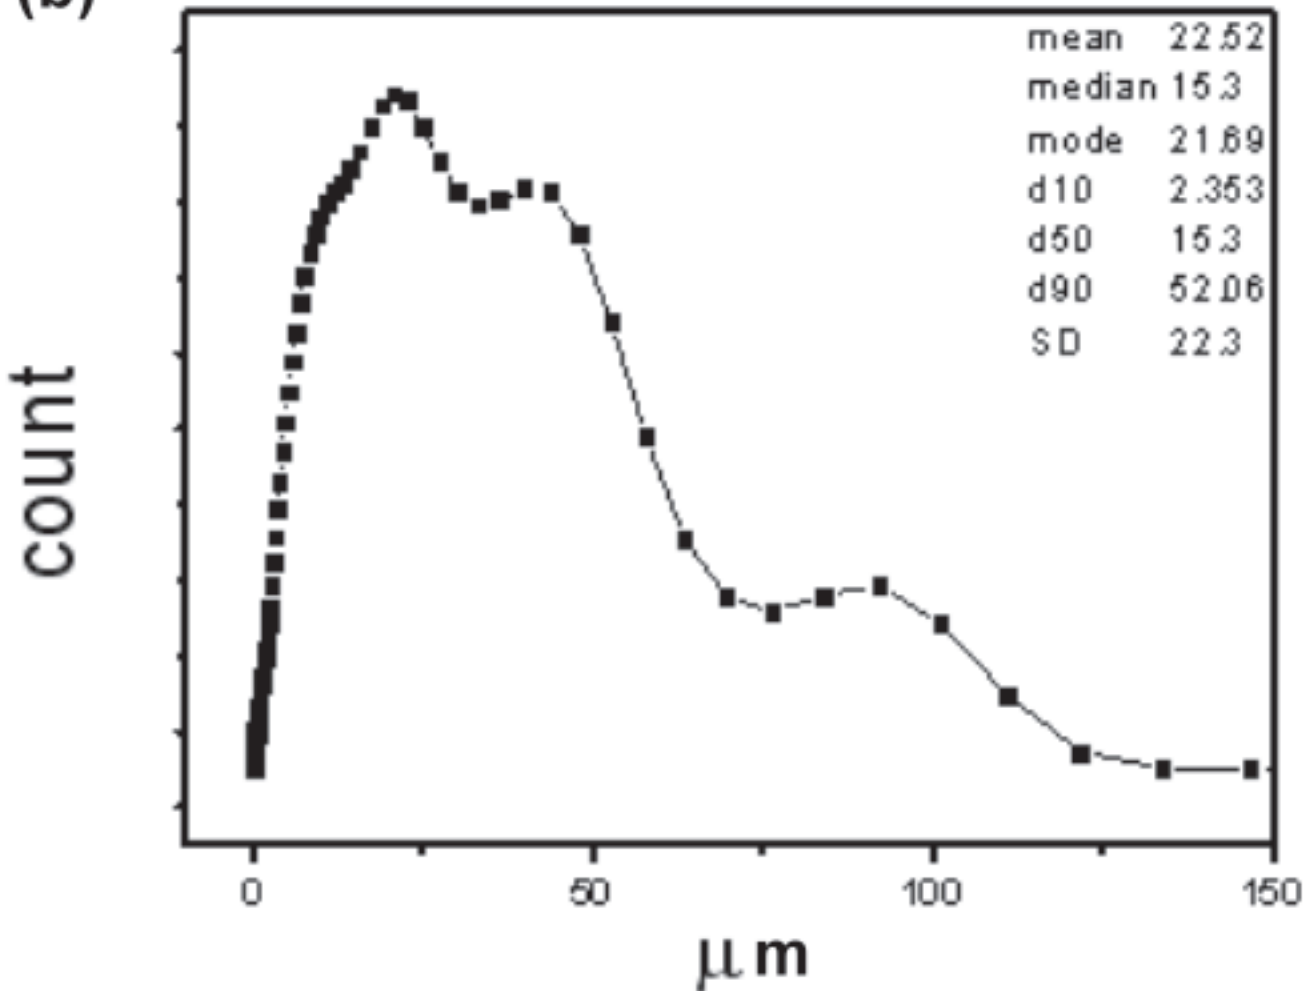

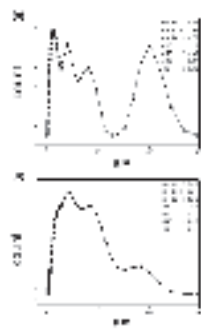

Supplement: b902299f.pdf [file b902299f.pdf]
